# Supplementary material
Source: MDPI journal article supplement (https://www.mdpi.com/2073-4395/11/10/2078)
Supplement: s1 [file s1]

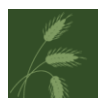

**Table S1:** Plot coordinates, crop, hailstorm dates, and p-values of classification validation with ANOVA for each plot

| Crop  | Storm date         | N Plot | Center Lat | Center Long | p-val |
|-------|--------------------|--------|------------|-------------|-------|
| Corn  | January 31, 2017   | 1      | -33.205299 | -65.009164  | 0.011 |
|       | February 17, 2017  | 2      | -32.326772 | -62.293934  | 0.021 |
|       | December 16, 2017  | 3      | -33.009968 | -62.700069  | 0.087 |
|       |                    | 4      | -32.406371 | -62.161917  | 0.006 |
|       | February 7, 2018   | 5      | -32.686204 | -64.350499  | 0.031 |
|       | October 30, 2018   | 6      | -34.188936 | -61.109156  | 0.045 |
|       | November 10, 2018  | 7      | -34.770423 | -62.372433  | 0.061 |
|       | December 10, 2018  | 8      | -32.700825 | -62.615687  | 0.087 |
|       |                    | 9      | -34.387490 | -61.079722  | 0.015 |
|       | December 14, 2018  | 10     | -31.671094 | -59.874197  | 0.020 |
|       |                    | 11     | -34.126362 | -63.513827  | 0.021 |
|       | November 29, 2019  | 12     | -34.457597 | -64.729923  | 0.034 |
|       | November 30, 2019  | 13     | -32.996271 | -62.756340  | 0.054 |
|       | January 11, 2020   | 14     | -34.780549 | -62.371644  | 0.020 |
|       | January 14, 2020   | 15     | -32.719953 | -62.626823  | 0.050 |
| Wheat | October 26, 2017   | 16     | -34.368211 | -65.395453  | 0.049 |
|       | September 28, 2018 | 17     | -35.386607 | -59.583204  | 0.050 |
|       | October 8, 2018    | 18     | -32.194550 | -61.636060  | 0.050 |
|       |                    | 19     | -35.590805 | -59.960572  | 0.006 |
|       | October 17, 2018   | 20     | -35.590175 | -59.922202  | 0.049 |
|       |                    | 21     | -35.554960 | -59.987288  | 0.048 |
|       |                    | 22     | -33.024986 | -62.592211  | 0.012 |
|       | October 29, 2018   | 23     | -32.268886 | -63.651098  | 0.066 |
|       |                    | 24     | -32.601671 | -64.067642  | 0.049 |
|       |                    | 25     | -32.475103 | -63.902846  | 0.006 |
|       | November 9, 2018   | 26     | -34.465144 | -60.710430  | 0.049 |
|       |                    | 27     | -34.198640 | -61.132206  | 0.000 |
|       |                    | 28     | -34.204099 | -61.064772  | 0.002 |
|       | November 10, 2018  | 29     | -32.197862 | -63.219415  | 0.041 |
|       |                    | 30     | -32.754540 | -62.287000  | 0.030 |
|       |                    | 31     | -32.789441 | -62.644404  | 0.039 |
|       | November 10, 2018  | 32     | -32.740848 | -62.488938  | 0.063 |
|       |                    | 33     | -32.867412 | -62.776591  | 0.049 |
|       |                    | 34     | -32.807596 | -62.661623  | 0.050 |
|       | December 10, 2018  | 35     | -32.617377 | -62.833192  | 0.010 |
|       |                    | 36     | -34.868738 | -62.441513  | 0.007 |
|       |                    | 37     | -36.102343 | -63.820670  | 0.038 |
|       | October 9, 2019    | 38     | -34.353844 | -61.088649  | 0.000 |
|       |                    | 39     | -34.390083 | -61.080159  | 0.038 |
|       |                    | 40     | -34.493010 | -61.294991  | 0.031 |
|       | October 27, 2019   | 41     | -33.139459 | -63.272869  | 0.010 |
|       |                    | 42     | -33.246730 | -62.635198  | 0.000 |
|       |                    | 43     | -33.614839 | -62.557898  | 0.057 |
|       | October 28, 2019   | 44     | -34.166119 | -62.343901  | 0.003 |
|       |                    | 45     | -34.164207 | -60.952369  | 0.011 |
|       | November 29, 2019  | 46     | -34.390434 | -61.079900  | 0.020 |
|       |                    | 47     | -34.306445 | -60.747383  | 0.121 |

  

| Crop | Storm date        | N Plot | Center Lat | Center Long | p-val |
|------|-------------------|--------|------------|-------------|-------|
| Soy  | January 9, 2017   | 48     | -32.638677 | -64.092386  | 0.040 |
|      | January 31, 2017  | 49     | -32.967824 | -64.483151  | 0.024 |
|      | February 16, 2017 | 50     | -33.084956 | -64.477753  | 0.050 |
|      |                   | 51     | -32.353273 | -62.330485  | 0.000 |
|      |                   | 52     | -32.350214 | -62.329250  | 0.140 |
|      | February 17, 2017 | 53     | -33.097545 | -64.817274  | 0.065 |
|      |                   | 54     | -32.483175 | -62.543017  | 0.036 |
|      |                   | 55     | -32.492017 | -62.594666  | 0.052 |
|      |                   | 56     | -32.523817 | -62.512996  | 0.038 |
|      | March 2, 2017     | 57     | -31.847459 | -63.646987  | 0.060 |
|      | April 7, 2017     | 58     | -32.547804 | -64.408059  | 0.046 |
|      |                   | 59     | -32.977758 | -62.577890  | 0.021 |
|      | December 16, 2017 | 60     | -33.001874 | -62.713474  | 0.006 |
|      |                   | 61     | -33.016163 | -62.587023  | 0.038 |
|      |                   | 62     | -32.870418 | -62.410558  | 0.016 |
|      |                   | 63     | -33.021379 | -62.742881  | 0.000 |
|      |                   | 64     | -33.031088 | -62.720791  | 0.002 |
|      | December 22, 2017 | 65     | -33.000453 | -62.771634  | 0.000 |
|      |                   | 66     | -32.990776 | -62.732021  | 0.008 |
|      |                   | 67     | -33.595336 | -62.940220  | 0.000 |
|      |                   | 68     | -33.075623 | -64.740891  | 0.049 |
|      | January 23, 2018  | 69     | -32.746867 | -64.718491  | 0.001 |
|      |                   | 70     | -32.670546 | -64.575285  | 0.000 |
|      | February 7, 2018  | 71     | -32.403914 | -62.154756  | 0.004 |
|      | April 22, 2018    | 72     | -34.040366 | -64.701025  | 0.090 |
|      | December 10, 2018 | 73     | -35.927560 | -63.405558  | 0.000 |
|      | December 13, 2018 | 74     | -32.283975 | -64.263404  | 0.118 |
|      |                   | 75     | -32.684861 | -62.477459  | 0.029 |
|      | January 9, 2019   | 76     | -32.765424 | -64.446099  | 0.000 |
|      | February 8, 2019  | 77     | -31.982602 | -64.329757  | 0.118 |
|      |                   | 78     | -31.593575 | -64.076741  | 0.007 |
|      | February 10, 2019 | 79     | -33.356226 | -65.162416  | 0.000 |
|      | February 22, 2019 | 80     | -31.976376 | -64.142721  | 0.000 |
|      | February 23, 2019 | 81     | -33.139512 | -62.419691  | 0.153 |
|      |                   | 82     | -33.138011 | -62.427229  | 0.003 |
|      | March 3, 2019     | 83     | -34.015054 | -64.569963  | 0.005 |
|      |                   | 84     | -33.060729 | -64.677631  | 0.108 |
|      | March 7, 2019     | 85     | -33.060521 | -64.666871  | 0.020 |
|      |                   | 86     | -33.746685 | -60.757219  | 0.037 |
|      | November 29, 2019 | 87     | -33.418501 | -64.989415  | 0.011 |
|      | January 5, 2020   | 88     | -33.413332 | -64.947740  | 0.008 |
|      | January 14, 2020  | 89     | -34.462967 | -64.748919  | 0.106 |
|      | January 15, 2020  | 90     | -34.562968 | -64.824213  | 0.003 |
|      |                   | 91     | -34.580741 | -64.823989  | 0.064 |
